# Supplementary material
Source: PubMed Central journal article supplement (PMC2755715)
Supplement: supp_M109.012617_jbc.M109.012617-1.pdf [file supp_M109.012617_jbc.M109.012617-1.pdf]

**Supplementary Table 1** Oligonucleotides used to make luciferase constructs

| construct     | Name  | Oligo sets for reporter constructs                                                    | Length |
|---------------|-------|---------------------------------------------------------------------------------------|--------|
| pMIR-ST14-wt  | wt-F  | 5'- <b><u>AGCTT</u></b> CTGCACCAGCGCCCCAGAACATAC <u>ACTGTGAA</u> CTCAATCTCCAGGGCTA-3' | 55 bp  |
|               | wt-R  | 5'- <b><u>CTAGT</u></b> AGCCCTGGAGATTGAGTTCACAGTGTATGTTCTGGGGCGCTGGTGCAGA-3'          | 55 bp  |
| pMIR-ST14-mut | mut-F | 5'- <b><u>AGCTT</u></b> CTGCACCAGCGCCCCAGAACATAC <u>GGAGCTGT</u> CTCAATCTCCAGGGCTA-3' | 55bp   |
|               | mut-R | 5'- <b><u>CTAGT</u></b> AGCCCTGGAGATTGAGACAGCTCCGTATGTTCTGGGGCGCTGGTGCAGA-3'          | 55bp   |

Oligonucleotides that were used to construct the miR-27b luciferase reporter construct. Flanked restriction enzyme sites HindIII/SpeI were underlined and in bold, the putative binding site of ST14 and miR-27b in wild and mutant types were double underlined. F: forward; R: reverse

**Supplementary Table 2** Expression level of microRNAs in MDA-MB-231 (sub line 4175) and MCF10A cells

|               |                                | <b>MDA-MB-231#4175</b> |                  |               |       |
|---------------|--------------------------------|------------------------|------------------|---------------|-------|
|               |                                | High intensity         | Medium intensity | Low intensity | Total |
|               |                                | (>5,000)               | (1,000-5,000)    | (1-1000)      |       |
|               | High intensity (>5,000)        | 37                     | 1                | 2             | 40    |
| <b>MCF10A</b> | Medium intensity (1,000-5,000) | 8                      | 12               | 8             | 28    |
|               | Low intensity (1-1,000)        | 1                      | 10               | 392           | 403   |
|               | Total                          | 46                     | 23               | 402           | 471   |

**Supplementary Table 3** Twenty two differentially expressed miRNAs between MDA-MB-231 sub line 4175 cell lines and MCF10A cell lines

| Group          | miRNA         | Mean intensities (4175) | Mean intensities (10A) | Ratio   | P value | Expressed In 4175 |
|----------------|---------------|-------------------------|------------------------|---------|---------|-------------------|
| 1 <sup>a</sup> | hsa-miR-200c  | 42                      | 28,290                 | -671.6  | 0.0032  | down              |
|                | hsa-miR-205   | 21                      | 66,950                 | -3169   | 0.0412  | down              |
|                | hsa-miR-342   | 390                     | 2,771                  | -7.1    | 0.0438  | down              |
| 2 <sup>b</sup> | hsa-miR-146a  | 2,143                   | 1                      | 2142.96 | 0.0088  | up                |
|                | hsa-miR-99a   | 12,474                  | 807                    | 15.46   | 0.0429  | up                |
| 3 <sup>c</sup> | hsa-miR-15a   | 6,339                   | 1,371                  | 4.62    | 0.0193  | up                |
|                | hsa-miR-27b   | 26,101                  | 7,837                  | 3.33    | 0.0324  | up                |
|                | hsa-miR-181d  | 4,416                   | 1,717                  | 2.57    | 0.0444  | up                |
|                | hsa-miR-30c   | 10,948                  | 2,679                  | 4.09    | 0.0478  | up                |
|                | hsa-miR-30b   | 9,298                   | 3,844                  | 2.42    | 0.0486  | up                |
| 4 <sup>d</sup> | hsa-miR-20a   | 10,127                  | 32,712                 | -3.23   | 0.0276  | down              |
|                | hsa-miR-21    | 31,817                  | 87,841                 | -2.76   | 0.0380  | down              |
|                | hsa-miR-106a  | 7,345                   | 23,015                 | -3.13   | 0.0401  | down              |
|                | hsa-miR-17-5p | 8702                    | 29,248                 | -3.36   | 0.0347  | down              |
| 5 <sup>e</sup> | hsa-miR-551b  | 44                      | 1                      | 44.28   | 0.0052  | up                |
|                | hsa-miR-486   | 176                     | 1                      | 176     | 0.0089  | up                |
|                | hsa-miR-503   | 530                     | 60                     | 8.86    | 0.0225  | up                |
|                | hsa-miR-138   | 161                     | 1                      | 161.16  | 0.0290  | up                |
|                | hsa-miR-152   | 484                     | 39                     | 12.26   | 0.0404  | up                |
|                | hsa-miR-491   | 36                      | 1                      | 35.96   | 0.0455  | up                |
|                | hsa-miR-141   | 1                       | 188                    | -188    | 0.0166  | down              |
|                | hsa-miR-582   | 1                       | 31                     | -31     | 0.0233  | down              |
