# Supplementary material
Source: PubMed Central journal article supplement (PMC2755715)

Supplementary Figure 1

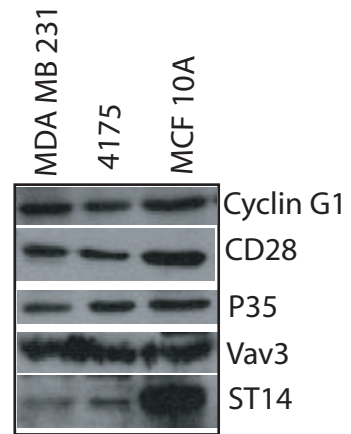

Supplement: supp_M109.012617_jbc.M109.012617-2.pdf [file supp_M109.012617_jbc.M109.012617-2.pdf]

# Supplementary Figure 2

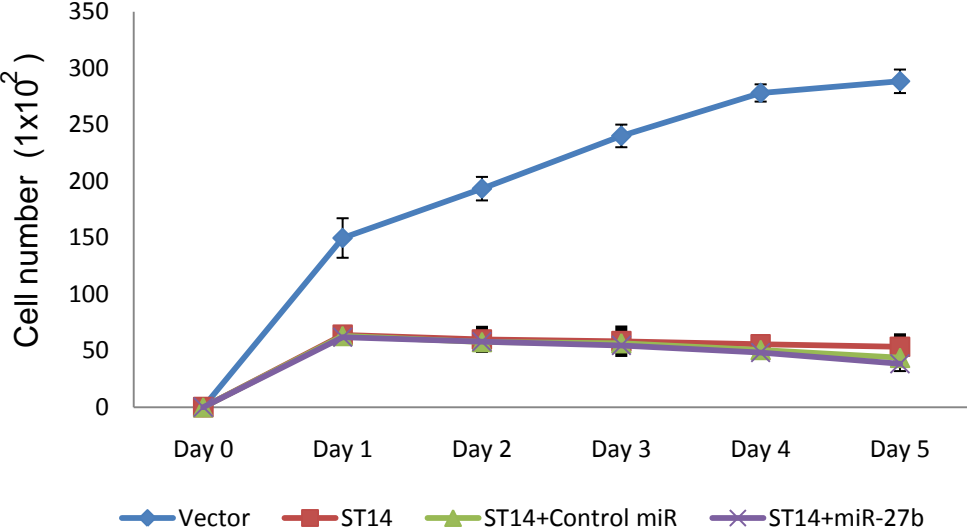

Supplement: supp_M109.012617_jbc.M109.012617-3.pdf [file supp_M109.012617_jbc.M109.012617-3.pdf]

### Supplementary Figure 3

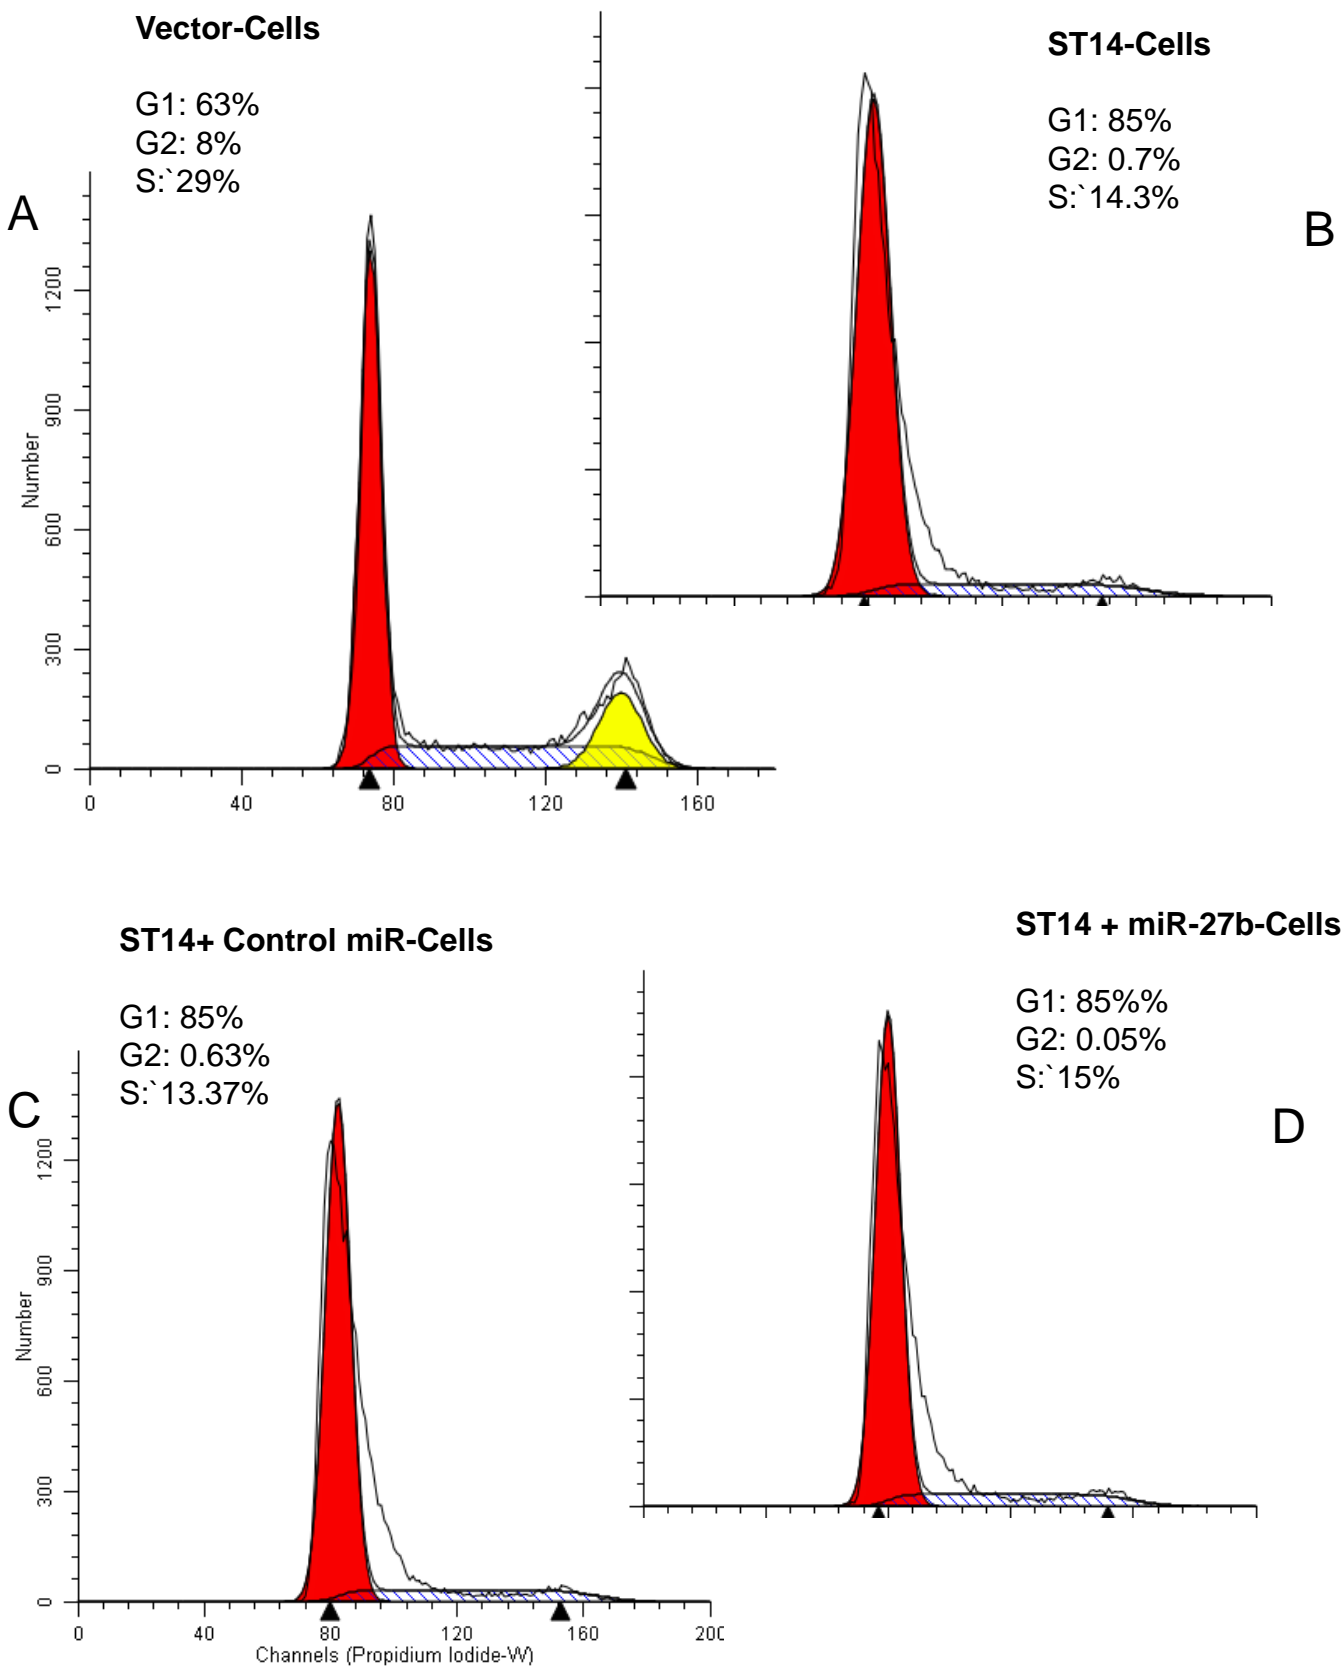

Supplement: supp_M109.012617_jbc.M109.012617-4.pdf [file supp_M109.012617_jbc.M109.012617-4.pdf]
